# Supplementary material for: Metastatic lymph node ratio demonstrates better prognostic stratification than pN staging in patients with esophageal squamous cell carcinoma after esophagectomy
Source: PubMed Central journal article supplement (PMC5150247; doi:10.1038/srep38804), 2016-12-12
Supplement: srep38804-s1.pdf [file srep38804-s1.pdf]

# **Metastatic lymph node ratio demonstrates better prognostic stratification than pN staging in patients with esophageal squamous cell carcinoma after esophagectomy**

Hongdian Zhang<sup>1, \*</sup>, Huagang Liang<sup>2, \*</sup>, Yongyin Gao<sup>3, \*</sup>, Xiaobin Shang<sup>1</sup>, Lei Gong<sup>1</sup>, Zhao Ma<sup>1</sup>, Ke Sun<sup>1</sup>, Peng Tang<sup>1</sup>, Zhentao Yu<sup>1</sup>

<sup>1</sup> Department of Esophageal Cancer, Tianjin Medical University Cancer Institute and Hospital, Key Laboratory of Cancer Prevention and Therapy of Tianjin City, Tianjin 300060, China

<sup>2</sup> Department of Thoracic Surgery, The First Hospital of Qinhuangdao, Hebei 066000, China

<sup>3</sup> Department of Cardiopulmonary Function, Tianjin Medical University Cancer Institute and Hospital, Key Laboratory of Cancer Prevention and Therapy of Tianjin City, Tianjin 300060, China

\* These authors contributed equally to this study

**Corresponding author:** Zhentao Yu

### Supplementary information

**Supplementary Table S1. Overall survival rates on the basis of N category according to the LNR category.** No.: number; N: node; LNR: lymph node ratio; 5-YSR: 5-year survival rate; MST: median survival time.

| Variables             | LNR0 |       |             | LNR1 |       |             | LNR2 |       |             | LNR3 |       |             | <i>x</i> <sup>2</sup> | <i>P</i> value |
|-----------------------|------|-------|-------------|------|-------|-------------|------|-------|-------------|------|-------|-------------|-----------------------|----------------|
|                       | No.  | 5-YSR | MST (month) | No.  | 5-YSR | MST (month) | No.  | 5-YSR | MST (month) | No.  | 5-YSR | MST (month) |                       |                |
| N category            |      |       |             |      |       |             |      |       |             |      |       |             |                       |                |
| N0                    | 223  | 42.5% | 43          | -    | -     | -           | -    | -     | -           | -    | -     | -           | -                     | -              |
| N1                    | -    | -     | -           | 82   | 21.9% | 26.0        | 12   | 34.1% | 20.0        | 5    | 0     | 4.9         | 30.646                | 0.000          |
| N2                    | -    | -     | -           | 11   | 10.9% | 32.6        | 17   | 6.3%  | 15.1        | 7    | 0     | 9.0         | 8.028                 | 0.018          |
| N3                    | -    | -     | -           | 2    | 50.0% | 16.0        | 9    | 11.1% | 13.0        | 19   | 0     | 5.9         | 8.321                 | 0.016          |
| <i>x</i> <sup>2</sup> |      | -     |             |      | 0.568 |             |      | 2.423 |             |      | 1.697 |             |                       |                |
| <i>P</i> value        |      | -     |             |      | 0.753 |             |      | 0.298 |             |      | 0.428 |             |                       |                |

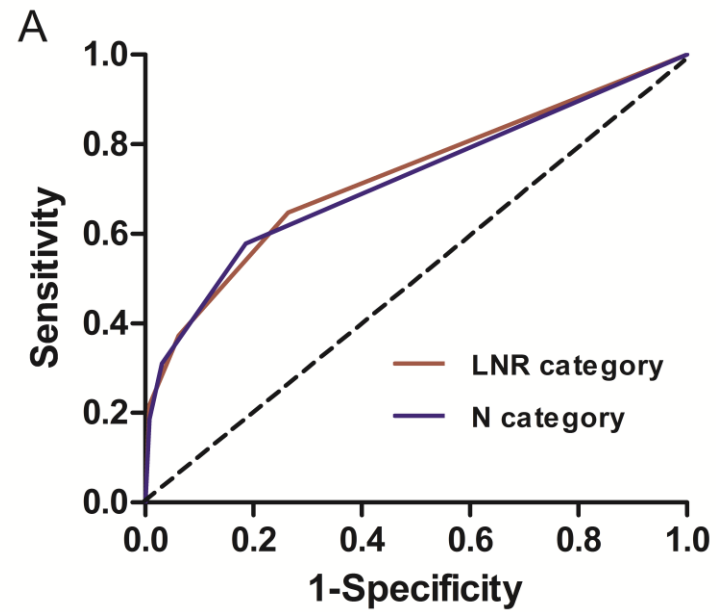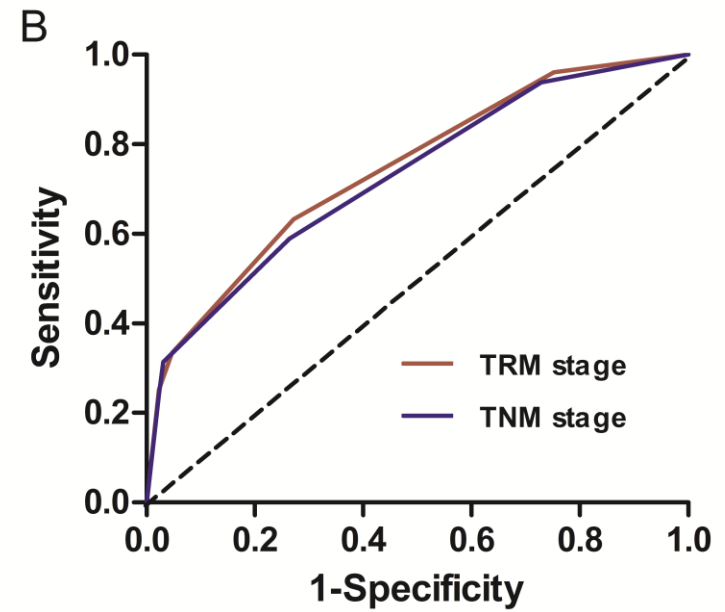

Supplementary Figure S1. Time-dependent ROC curves for 5-year overall survival prediction of ESCC patients after radical esophagectomy. (A) between N category and LNR category, (B) between TNM stage and TRM stage.
